# Supplementary material
Source: MDPI journal article supplement (https://www.mdpi.com/1996-1073/14/15/4538)
Supplement: s1 [file s1]

## Article

# Fabrication of Silicon Nanowire Metal-Oxide-Semiconductor Capacitors with $\text{Al}_2\text{O}_3/\text{TiO}_2/\text{Al}_2\text{O}_3$ Stacked Dielectric Films for the Application to Energy Storage Devices

Ryota Nezasa <sup>1</sup>, Kazuhiro Gotoh <sup>1</sup>, Shinya Kato <sup>2</sup>, Satoru Miyamoto <sup>1</sup>, Noritaka Usami <sup>1</sup> and Yasuyoshi Kurokawa <sup>1,\*</sup>

<sup>1</sup> Department of Materials Process Engineering, Graduate School of Engineering, Nagoya University, Furo-Cho, Chikusa-ku, Nagoya 464-8603, Japan; ryota.nezasa@usa-labo.nagoya (R.N.); gotoh.kazuhiro@material.nagoya-u.ac.jp (K.G.); miyamoto.satoru@material.nagoya-u.ac.jp (S.M.); usa@material.nagoya-u.ac.jp (N.U.)

<sup>2</sup> Department of Electrical and Mechanical Engineering, Graduate School of Engineering, Nagoya Institute of Technology, Showa-ku, Nagoya 466-8555, Japan; kato.shinya.nitech.ac.jp

\* Correspondence: kurokawa.yasuyoshi@material.nagoya-u.ac.jp

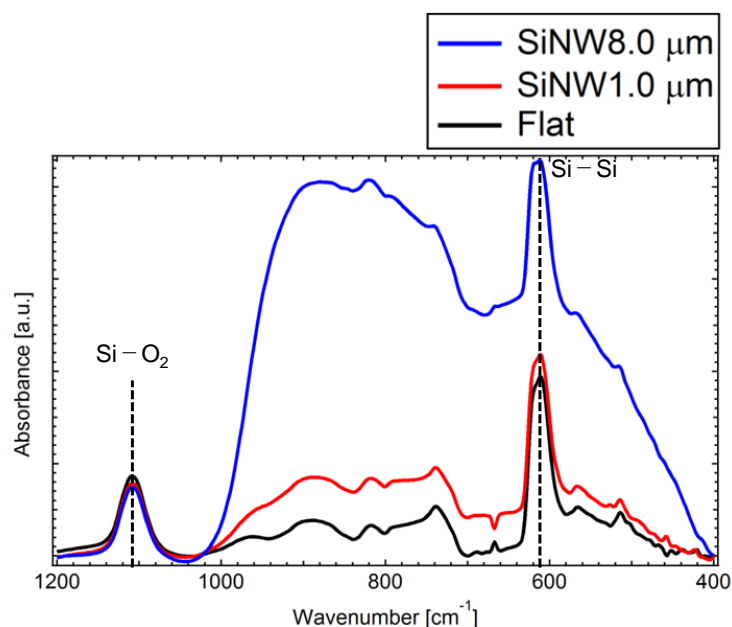

**Figure S1.** FT-IR spectra of SiNW arrays and a flat Si wafer coated by ATA. Two pronounced bands are attributed to IR absorption by Si–O<sub>2</sub> complexes (at ~1107 cm<sup>−1</sup>) and by Si lattice phonons (at ~610 cm<sup>−1</sup>), respectively. An Al<sub>2</sub>O<sub>3</sub> broad band (500~1000 cm<sup>−1</sup>) can be seen. If TiO<sub>2</sub> was crystallized, strong TiO<sub>2</sub> anatase band at 435 cm<sup>−1</sup> could be observed. However, since there is no strong band at 435 cm<sup>−1</sup>, TiO<sub>2</sub> is amorphous.

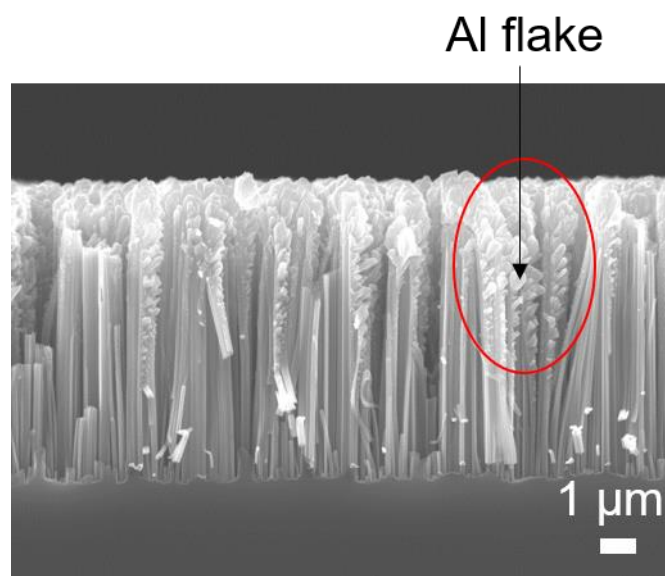

**Figure S2.** Cross-sectional SEM image of a SiNW MOS capacitor after Al evaporation. Flakes of Al crystals can be seen from the top to middle of SiNWs. Since Al electrodes were deposited by thermal evaporation, SiNWs were not perfectly coated with Al.

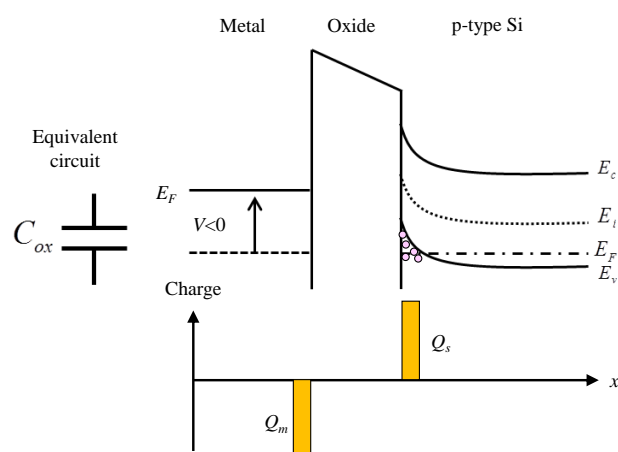

**Figure S3.** Energy band diagram and equivalent circuit of a MOS capacitor in the range of  $V < 0$ .

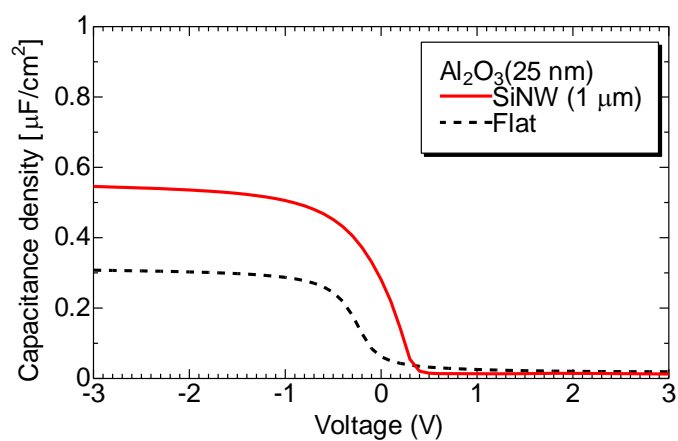

**Figure S4.** C-V characteristics of (Dashed line) a flat MOS capacitor and (Solid line) a SiNW MOS capacitor using 25-nm-thick  $\text{Al}_2\text{O}_3$  as an insulator. The length of SiNWs is  $1.0\ \mu\text{m}$ .

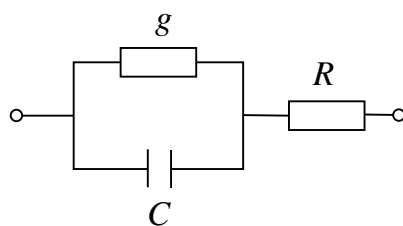

**Figure S5.** Equivalent circuit approximation of a leaky MOS capacitor.

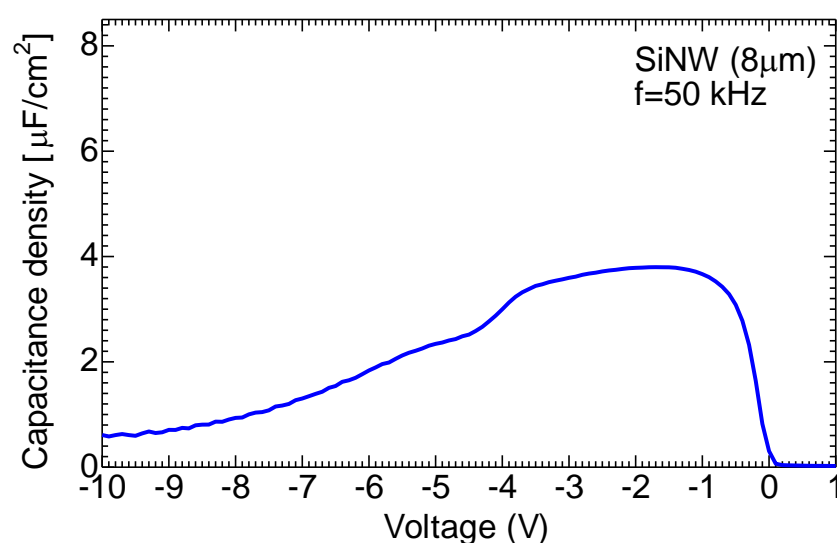

**Figure S6.** C-V characteristics of the SiNW MOS capacitor with the length of  $8\ \mu\text{m}$  measured at 50 kHz.

In this experiment, a total impedance was measured as an equivalent parallel RC combination. The capacitance density was decreased with increasing the absolute value of applied voltage. This trend is different from the Figure 3a. As mentioned before, C-V measurement at low frequency is not reliable due to the large influence of leakage current. To keep  $Q_i > 1$ , the frequency should be enough higher than around 50 kHz. Moreover, Choi *et al.* reported sharp decrease in capacitance density at acceleration region due to tunnel leakage current [42]. Therefore, the decrease in capacitance density in Figure S5 is also due to the leakage current density. To avoid this, higher measurement frequency is necessary.
